# Supplementary material
Source: PubMed Central journal article supplement (PMC4106900)
Supplement: NIHMS409456-supplement-1_si_001.pdf [file NIHMS409456-supplement-1_si_001.pdf]

## SUPPORTING INFORMATION (SI)

**Title of Manuscript:** A New Positron Emission Tomography (PET) Radioligand for Imaging Sigma-1 Receptors in Living Subjects.

**Authors:** Michelle L. James, Bin Shen, Cristina Zavaleta, Carsten H. Nielsen, Christophe Mesangeau, Pradeep K. Vuppala, Carmel Chan, Bonnie A. Avery, James A. Fishback, Rae R. Matsumoto, Sanjiv S. Gambhir, Christopher R. McCurdy, and<sup>1</sup> Frederick T. Chin

**Contents of SI:** Synthesis of compounds **10** and **11**, table detailing affinities and selectivity ratios of some known sigma-1 receptor ligands, and a table showing *in vitro* binding affinities of compound **13**.

**6-(3-chloropropanoyl)benzo[d]thiazol-2(3H)-one (10).** DMF (8.6 mL, 111 mmol) was slowly added to aluminium chloride (53.3 g, 400 mmol) under vigorous stirring. After 15 min of stirring, 2-hydroxybenzothiazole (6.04 g, 40 mmol) was added, and the mixture was brought to 45 °C. After 15 min, 3-chloropropionyl chloride (5.8 mL, 60 mmol) was added and the reaction mixture was heated at 85 °C for 3 h. The hot mixture was carefully poured onto ice, and the crude product was collected by filtration. The solid was dissolved in ethyl acetate and water was added. The layers were then separated and, the organic layer was washed with brine and dried. The solvent was removed in vacuo, and the residue was recrystallized from toluene/dioxane to give 5.15 g (54%) of 6-(3-chloropropanoyl)benzo[d]thiazol-2(3H)-one as a orange solid. <sup>1</sup>H NMR (DMSO-*d*<sub>6</sub>): δ 12.26 (br s, 1H), 8.24 (d, *J* = 1.4 Hz, 1H), 7.90 (dd, *J* = 8.4, 1.7 Hz, 1H), 7.19 (d, *J* = 8.4 Hz, 1H), 3.91 (t, *J* = 6.4 Hz, 2H), 3.50 (d, *J* = 6.3 Hz, 2H). <sup>13</sup>C NMR (DMSO-*d*<sub>6</sub>): δ 195.07, 170.37, 140.49, 130.94, 126.89, 123.77, 123.25, 111.19, 40.38, 39.52. MS (EI) *m/z* 242 (M<sup>+</sup>+1).

**6-(3-chloropropyl)benzo[d]thiazol-2(3H)-one (11).** Triethylsilane (4.2 mL, 26 mmol) was added to a stirred solution of **10** (2.73 g, 11.3 mmol) in trifluoroacetic acid (15 mL) and the reaction mixture was stirred for 4 h at room temperature. The solvent was removed in vacuo, and

the residue was purified by chromatography on a silica gel column using a gradient of petroleum ether/ether (7:3 to 5:5) as the eluent and recrystallized from toluene/hexanes to give 1.85 g (72%) of 6-(3-chloropropyl)benzo[d]thiazol-2(3*H*)-one as a white solid. <sup>1</sup>H NMR (DMSO-*d*<sub>6</sub>): δ 11.76 (br s, 1H), 7.38 (s, 1H), 7.10 (d, *J* = 8.0 Hz, 1H), 7.03 (d, *J* = 8.0 Hz, 1H), 3.59 (t, *J* = 6.4 Hz, 2H), 2.68 (t, *J* = 7.4 Hz, 2H), 1.99 (quart, *J* = 7.2 Hz, 2H). <sup>13</sup>C NMR (DMSO-*d*<sub>6</sub>): δ 169.89, 135.12, 134.45, 126.53, 123.40, 122.13, 111.31, 44.52, 33.75, 31.79. MS (EI) *m/z* 226 (*M*<sup>+</sup>-1)

**Table 1. Affinities and selectivity ratios of sigma-1 receptor (S1R) ligands reported in literature.**

| Ligand Name                | <i>K<sub>i</sub></i> (nM) |                 | Selectivity Ratio                                  | Reference(s) |
|----------------------------|---------------------------|-----------------|----------------------------------------------------|--------------|
|                            | S1R                       | S2R             | <i>K<sub>i</sub></i> S2R/ <i>K<sub>i</sub></i> S1R |              |
| <b>1</b> ((+)-Pentazocine) | <b>4.6</b>                | <b>1052</b>     | <b>229</b>                                         | 49           |
| <b>2</b> (Haloperidol)     | <b>3.1</b>                | <b>55</b>       | <b>18</b>                                          | 49           |
| <b>3</b> (SA4503)          | <b>4.4</b>                | <b>242</b>      | <b>55</b>                                          | 41           |
| <b>4</b> (FM SA4503)       | <b>6.4</b>                | <b>250</b>      | <b>39</b>                                          | 35           |
| <b>5</b> (FPS)             | <b>0.5</b>                | <b>144</b>      | <b>288</b>                                         | 38           |
| <b>6</b> (SFE)             | <b>5.0</b>                | <b>361</b>      | <b>72</b>                                          | 38           |
| <b>7</b>                   | <b>2.7</b>                | <b>103</b>      | <b>38</b>                                          | 30           |
| <b>8</b> (Fluspidine)      | <b>1.4</b>                | <b>&gt;600</b>  | <b>&gt;429</b>                                     | 28           |
| <b>9</b> (SN56)            | <b>0.56</b>               | <b>&gt;1000</b> | <b>&gt;1000</b>                                    | 33           |

**Table 2. In vitro binding affinities of compound 13**

|                                                   | <b>Radioligand</b>                              | <b>Nonspecific binding</b> | <b>Tissue</b>       | <b>K<sub>i</sub> (nM)</b> |
|---------------------------------------------------|-------------------------------------------------|----------------------------|---------------------|---------------------------|
| Sigma receptors:                                  |                                                 |                            |                     |                           |
| S1R                                               | 5 nM [ <sup>3</sup> H](+)-pentazocine           | 10 mM haloperidol          | Rat brain           | 0.0025 ± 0.0009           |
| S2R                                               | 3 nM [ <sup>3</sup> H]di-o-tolylguanidine       | 10 mM haloperidol          | Rat brain           | 364 ± 63                  |
| S1R                                               | 5 nM [ <sup>3</sup> H](+)-pentazocine           | 10 mM haloperidol          | Rat liver           | 0.96 ± 0.21               |
| S2R                                               | 3 nM [ <sup>3</sup> H]di-o-tolylguanidine       | 10 mM haloperidol          | Rat liver           | 467 ± 60                  |
| Monoamine transporters:                           |                                                 |                            |                     |                           |
| Dopamine                                          | 0.5 nM [ <sup>3</sup> H]WIN 35,428              | 50 mM cocaine              | Rat striatum        | 3586 ± 286                |
| Serotonin                                         | 0.2 nM [ <sup>3</sup> H]paroxetine              | 1.5 mM imipramine          | Rat brainstem       | >10,000                   |
| Norepinephrine                                    | 0.5 nM [ <sup>3</sup> H]nisoxetine              | 4 mM desipramine           | Rat cerebral cortex | 68 ± 5                    |
| Other neurotransmitter receptors:                 |                                                 |                            |                     |                           |
| Adenosine                                         | 4.0 nM [ <sup>3</sup> H]NECA                    | 1 mM NECA                  | Bovine striatum     | >10,000 <sup>a</sup>      |
| Adrenergic, alpha <sub>1</sub>                    | 0.3 nM [ <sup>3</sup> H]7-MeOxy-prazosin        | 1 mM phentolamine          | Rat forebrain       | >10,000 <sup>a</sup>      |
| Adrenergic, beta <sub>1</sub><br>neuroepithelioma | 0.04 nM [ <sup>125</sup> I](-)iodocyanopindolol | 3 mM alprenolol            | Human               | >10,000 <sup>a</sup>      |
| Cannabinoid, CB <sub>1</sub><br>HEK293 cells      | 0.5 nM [ <sup>3</sup> H]CP 55940                | 1 mHU-210                  | Human recombinant   | >10,000 <sup>a</sup>      |
| Cannabinoid, CB <sub>2</sub><br>CHO cells         | 0.5 nM [ <sup>3</sup> H]CP 55940                | 1 mM HU-210                | Human recombinant   | >10,000 <sup>a</sup>      |
| Dopamine, non-selective                           | 0.3 nM [ <sup>3</sup> H]spiperone               | 1 mM spiperone             | Bovine striatum     | >10,000 <sup>b</sup>      |
| Dopamine D <sub>2</sub>                           | 5 nM [ <sup>3</sup> H](-)-sulpiride             | 1 mM haloperidol           | Rat brain           | >10,000                   |
| GABA A, agonist site                              | 5 nM [ <sup>3</sup> H]GABA                      | 1 mM GABA                  | Bovine cerebellum   | >10,000 <sup>a</sup>      |
| GABA A, BDZ alpha 1                               | 1 nM [ <sup>3</sup> H]flunitrazepam             | 0.5 mM flumazenil          | Bovine cortex       | >10,000 <sup>a</sup>      |
| GABA-B                                            | 1 nM [ <sup>3</sup> H]CGP 54626A                | 100 mM baclofen            | Rat cerebral cortex | >10,000 <sup>a</sup>      |
| Glutamate, AMPA                                   | 5 nM [ <sup>3</sup> H]AMPA                      | 100 mM AMPA                | Rat forebrain       | >10,000 <sup>a</sup>      |
| Glutamate, kainate                                | 10 nM [ <sup>3</sup> H]kainic acid              | 10 mM kainic acid          | Rat forebrain       | >10,000 <sup>a</sup>      |
| Glutamate, NMDA agonist                           | 2 nM [ <sup>3</sup> H]CGP 39653                 | 300 mM NMDA                | Rat forebrain       | >10,000 <sup>a</sup>      |

|                                   |                                                                             |                               |                        |                      |
|-----------------------------------|-----------------------------------------------------------------------------|-------------------------------|------------------------|----------------------|
| Glutamate, NMDA glycine           | 4 nM [ <sup>3</sup> H]MDL-105,519                                           | 3 mM MDL-105,519              | Rat cortex/hippoc      | >10,000 <sup>a</sup> |
| Glutamate, NMDA/PCP               | 10 nM [ <sup>3</sup> H]TCP                                                  | 100 mM (+)-MK801              | Rat forebrain          | >10,000 <sup>a</sup> |
| 5 nM [ <sup>3</sup> H]TCP         | 10 mM cyclazocine                                                           |                               | Rat brain              | >10,000              |
| Glutamate, mGluR1                 | 20 nM [ <sup>3</sup> H]quisqualic acid                                      | 1 mM L-glutamate              | Rat cerebellum         | >10,000 <sup>a</sup> |
| Glutamate, mGluR5                 | 10 nM [ <sup>3</sup> H]MPEP                                                 | 10 mM MPEP                    | Rat brain              | >10,000 <sup>a</sup> |
| Glycine,strychnine                | 16 nM [ <sup>3</sup> H]strychnine                                           | 100 mM strychnine nitrate     | Rat spinal cord        | >10,000 <sup>a</sup> |
| Histamine H <sub>1</sub>          | 2 nM [ <sup>3</sup> H]pyrilamine                                            | 10 mM triprolidine            | Bovine cerebellum      | >10,000 <sup>a</sup> |
| Histamine H <sub>3</sub>          | 0.2 nM [ <sup>3</sup> H]N-a-methylhistamine                                 | 0.1 nM R(-)-a-methylhistamine | Rat forebrain          | >10,000 <sup>a</sup> |
| Muscarinic, central               | 0.15 nM [ <sup>3</sup> H]QNB                                                | 0.1 mM atropine               | Rat cerebral cortex    | >10,000 <sup>a</sup> |
| Muscarinic M <sub>1</sub>         | 0.5 nM [ <sup>3</sup> H]N-methyl scopolamine                                | 1 mM (-)-scopolamine          | Human recombinant      | >10,000 <sup>a</sup> |
| CHO cells                         |                                                                             |                               |                        |                      |
| Nicotinic, muscle                 | 1 nM [ <sup>125</sup> I]a-bungarotoxin                                      | 10 mM nicotine                | Human TE671 cells      | >10,000 <sup>a</sup> |
| Opioid, non-selective             | 0.5 nM [ <sup>3</sup> H]bremazocine                                         | 10 mM levallorphan            | Rat brain              | 1318 ± 19            |
| Hormones, peptides, steroids:     |                                                                             |                               |                        |                      |
| Angiotensin II, AT <sub>1</sub>   | 0.06 nM [ <sup>125</sup> I](Sar <sup>1</sup> -Ile <sup>8</sup> )angiotensin | 1 mM angiotensin II           | Human KAN-TS cells     | >10,000 <sup>a</sup> |
| Angiotensin II, AT <sub>2</sub>   | 0.1 nM [ <sup>125</sup> I]Tyr <sup>4</sup> -angiotensin II                  | 0.05 mM angiotensin II        | Bovine cerebellum      | >10,000 <sup>a</sup> |
| Bradykinin, BK <sub>2</sub>       | 0.2 nM [ <sup>3</sup> H]bradykinin                                          | 100 nM bradykinin TFA         | Guinea pig ileum       | >10,000 <sup>a</sup> |
| Cholecystokinin, CCK <sub>A</sub> | 0.02 nM [ <sup>125</sup> I]CCK-8                                            | 1 mM CCK-8                    | Mouse pancreas         | >10,000 <sup>a</sup> |
| Cholecystokinin, CCK <sub>B</sub> | 0.02 nM [ <sup>125</sup> I]CCK-8                                            | 1 mM CCK-8                    | Mouse forebrain        | >10,000 <sup>a</sup> |
| CRF, non-selective                | 0.1 nM [ <sup>125</sup> I]Tyr <sup>0</sup> -oCRF                            | 1 mM Tyr <sup>0</sup> -oCRF   | Rat cerebral cortex    | >10,000 <sup>a</sup> |
| Endothelin, ET <sub>A</sub>       | 0.033 nM [ <sup>125</sup> I]endothelin-1                                    | 0.1 mM endothelin-1           | Human neuroblastoma    | >10,000 <sup>a</sup> |
| Endothelin, ET <sub>B</sub>       | 0.025 nM [ <sup>125</sup> I]endothelin-1                                    | 0.1 mM endothelin-1           | Human astrocytoma      | >10,000 <sup>a</sup> |
| Estrogen                          | 0.1 nM [ <sup>125</sup> I]3,7b-estradiol                                    | 10 nM 17b-estadiol            | Human breast cancer    | >10,000 <sup>a</sup> |
| Galanin, non-selective            | 0.07 nM [ <sup>125</sup> I]galanin                                          | 100 nM galanin (porcine)      | Rat brain              | >10,000 <sup>a</sup> |
| Glucocorticoid                    | 1 nM [ <sup>3</sup> H]dexamethasone                                         | 10 mM triamcinolone           | Human recombinant      | >10,000 <sup>a</sup> |
| Neurokinin, NK <sub>1</sub>       | 1.4 nM [ <sup>3</sup> H]substance P                                         | 1 mM substance P              | Rat submaxillary gland | >10,000 <sup>a</sup> |
| Neurokinin, NK <sub>2</sub>       | 0.1 nM [ <sup>125</sup> I]neurokinin A                                      | 1 mM neurokinin A             | Human recombinant      |                      |
| Platelet activating factor        | 1.7 nM [ <sup>3</sup> H]hexadecyl-acetyl-PAF                                | 1 mM C <sub>16</sub> -PAF     | Rabbit platelets       | >10,000 <sup>a</sup> |
| CHO cells                         |                                                                             |                               |                        |                      |
| Neurokinin, NK <sub>3</sub> (NKB) | 0.1 nM [ <sup>125</sup> I]eledoisin                                         | 1 mM eledoisin                | Rat cerebral cortex    | >10,000 <sup>a</sup> |
| Oxytocin                          | 1 nM [ <sup>3</sup> H]oxytocin                                              | 1 mM oxytocin                 | Rat uterus             | >10,000 <sup>a</sup> |
| Platelet activating factor        | 1.7 nM [ <sup>3</sup> H]hexadecyl-acetyl-PAF                                | 1 mM C <sub>16</sub> -PAF     | Rabbit platelets       | >10,000 <sup>a</sup> |

|                                        |                                                     |                                    |                        |                      |
|----------------------------------------|-----------------------------------------------------|------------------------------------|------------------------|----------------------|
| Testosterone, cytosolic                | 0.5 nM [ <sup>3</sup> H]methyltrienolone            | 0.7 mM methyltrienolone            | Human LnCAP cells      | >10,000 <sup>a</sup> |
| TRH                                    | 2 nM [ <sup>3</sup> H](3MeHis <sup>2</sup> )TRH     | 10 mM TRH                          | Rat forebrain          | >10,000 <sup>a</sup> |
| VIP, non-selective                     | 0.05 nM [ <sup>125</sup> I]VIP                      | 1 mM VIP                           | Rat forebrain          | >10,000 <sup>a</sup> |
| Vasopressin 1                          | 0.5 nM [ <sup>3</sup> H]phenylalanyl- 3,4,5-v       | 1 mM Arg <sup>8</sup> -vasopressin | Rat liver              | >10,000 <sup>a</sup> |
| Ion channels:                          |                                                     |                                    |                        |                      |
| Calcium, type L (DHP)                  | 0.2 nM [ <sup>3</sup> H]nitrendipine                | 1 mM nifedipine                    | Rat cerebral cortex    | >10,000 <sup>a</sup> |
| Calcium, type N                        | 0.01 nM [ <sup>125</sup> I]w-conotoxin GVIA         | 0.1 mM w-conotoxin GVIA            | Rat cerebral cortex    | >10,000 <sup>a</sup> |
| Potassium, ATP-sensitive               | 0.2 nM [ <sup>3</sup> H]glibenclamide               | 0.1 mM glibenclamide               | Rat cerebral cortex    | >10,000 <sup>a</sup> |
| Potassium, Ca <sup>2+</sup> act VI     | 0.05 nM [ <sup>125</sup> I]apamin                   | 100 nM apamin                      | Rat forebrain          | >10,000 <sup>a</sup> |
| Enzymes and other miscellaneous:       |                                                     |                                    |                        |                      |
| Choline acetyltransferase              | 0.2 nM [ <sup>14</sup> C]acetyl coenzyme            | 0.1 mM Ro 41-1049                  | Rat cerebral cortex    | >10,000 <sup>a</sup> |
| Glutamic acid decarboxylase            | 4 mM [ <sup>14</sup> C]L-glutamic acid              | 100 mM aminooxy acetic acid        | Rat striatum           | >10,000 <sup>a</sup> |
| Leukotriene, LTB <sub>4</sub> (BLT)    | 0.48 nM [ <sup>3</sup> H]leukotriene B <sub>4</sub> | 500 nM leukotriene B <sub>4</sub>  | Guinea pig spleen      | >10,000 <sup>a</sup> |
| Leukotriene, LTD <sub>4</sub> (CysLT1) | 0.2 nM [ <sup>3</sup> H]leukotriene D <sub>4</sub>  | 1 mM leukotriene D <sub>4</sub>    | Guinea pig lung        | >10,000 <sup>a</sup> |
| MAO-A oxidase, peripheral              | 50 mM [ <sup>14</sup> C]5-HT                        | 1 mM Ro 41-1049                    | Rat liver mitochondria | >10,000 <sup>a</sup> |
| MAO-B oxidase, peripheral              | 10 mM [ <sup>14</sup> C]phenylethylamine            | 10 mM Ro 16-6491                   | Rat liver mitochondria | >10,000 <sup>a</sup> |
| Nitric oxide, NOS                      | 5 nM [ <sup>3</sup> H]NOARG                         | 100 mM NOARG                       | Rat brain              | >10,000 <sup>a</sup> |
| Thromboxane, TXA <sub>2</sub>          | 2 nM [ <sup>3</sup> H]SQ 29,548                     | 10 mM pinane-thromboxane           | Human platelets        | >10,000 <sup>a</sup> |

Affinities ( $K_i$  in nM) were determined in tissue or cell homogenates. The values in this table represent the mean  $\pm$  SEM from replicate assays. Values of >10,000 signify that there was less than 50% displacement of the radioligand at that concentration. <sup>a</sup>These values were determined by NovaScreen. All other values were determined in-house using the assay conditions described in the Experimental Section of this manuscript. BTZ = benzothiazepine; CRF = corticotrophin releasing factor; DHA = dihydroalprenolol; DHP = dihydropyridine; GABA =  $\gamma$ -aminobutyric acid; LSD = lysergic acid diethylamide; MAO = monoamine oxidase; MPEP = 2-methyl-6-(phenylethynyl)pyridine; NECA = 5'-N-ethylcarboxamidoadenosine; NOARG = L-N<sup>G</sup>-nitro-arginine; PAF = platelet activating factor; QNB = quinuclidinyl benzilate; S1R = sigma-1 receptor; S2R = sigma-2 receptor; TBOB = t-butylbicycloorthobenzoate; TBPS = t-butylbicyclophosphorothionate; TCP = 1-[1-(2-thienyl)cyclohexyl]piperidine; TRH = thyrotropin releasing hormone; VIP = vasoactive intestinal peptide.
